# Supplementary material for: Candida tropicalis Systemic Infection Redirects Leukocyte Infiltration to the Kidneys Attenuating Encephalomyelitis
Source: MDPI journal article supplement (doi:10.3390/jof7090757), 2021-09-14
Supplement: s1 [file s1]

# *Candida tropicalis* Systemic Infection Redirects Leukocyte Infiltration to the Kidneys Attenuating Encephalomyelitis

Natália Munhoz-Alves <sup>1</sup>, Luiza Ayumi Nishiyama Mimura <sup>1</sup>, Rosa Marlene Viero <sup>2</sup>, Eduardo Bagagli <sup>1</sup>, Jean Pierre Schatzmann Peron <sup>3</sup>, Alexandrina Sartori <sup>1,4</sup>, and Thais Fernanda de Campos Fraga-Silva <sup>1\*</sup>

<sup>1</sup> Department of Chemistry and Biological Sciences, Institute of Biosciences, São Paulo State University (UNESP), Botucatu 18618-689, Brazil; natalia.mnhz@gmail.com (N.M.-A.); luizamimura@gmail.com (L.A.N.M.); eduardo.bagagli@unesp.br (E.B.); alexandrina.sartori@unesp.br (A.S.)

<sup>2</sup> Department of Pathology, Botucatu Medical School, São Paulo State University (UNESP), Botucatu 18618-687, Brazil; rosa.viero@unesp.br

<sup>3</sup> Neuroimmune Interactions Laboratory, Department of Immunology, Institute of Biomedical Sciences (ICB) IV, University of São Paulo (USP), São Paulo 05508-000, Brazil; jeanpierre@usp.br

<sup>4</sup> Postgraduate Program in Tropical Diseases, Botucatu Medical School, São Paulo State University (UNESP), Botucatu 18618-687, Brazil

\* Correspondence: thaisfragasilva@gmail.com

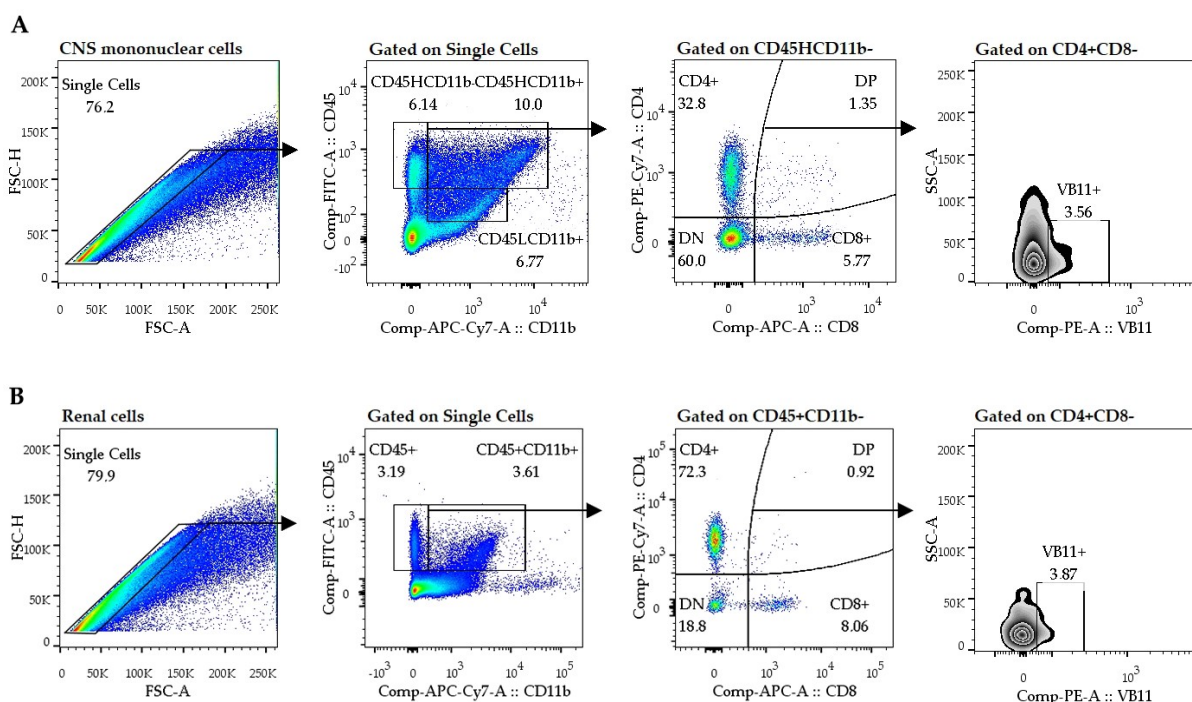

**Figure S1.** Flow cytometric gate strategy for leukocyte populations. CNS mononuclear cells (A) and renal cells (B) were collected and analyzed by flow cytometry. The percentage of macrophages or activated microglia (CD45<sup>High</sup>CD11b<sup>+</sup>) and other immune cells (CD45<sup>High</sup>CD11b<sup>-</sup>) was evaluated in single cells (FSC-H vs FSC-A) gating. The percentage of T helper lymphocytes (CD4<sup>+</sup>CD8<sup>-</sup>) was gating to assess the percentage of VB11<sup>+</sup> cells. Non-stained cells were used to define gating strategy. Flow cytometry images were created using FlowJo 10.7.1.

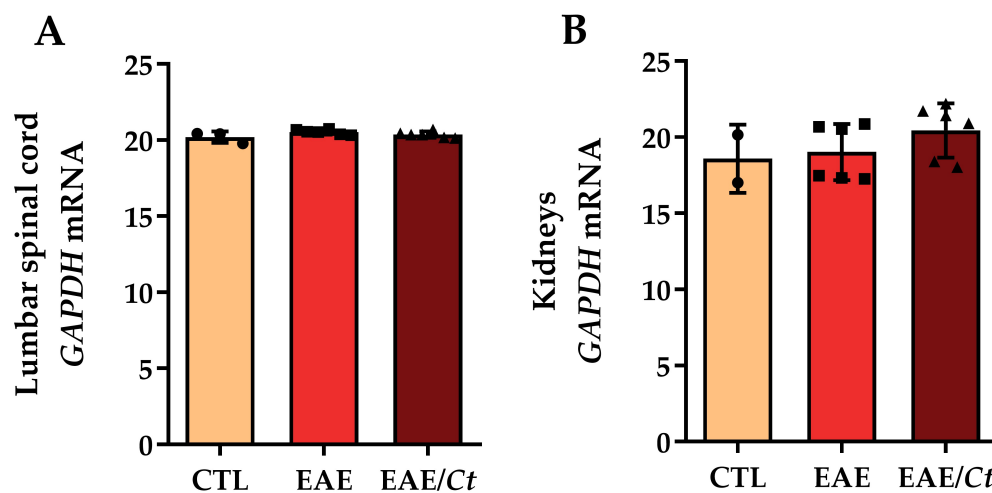

**Figure S2.** Expression of endogenous PCR control. Female C57BL/6 mice were infected with  $1 \times 10^6$  viable *C. tropicalis* yeasts three days after EAE induction and evaluated for the *GAPDH* mRNA expression in lumbar spinal cord (A) and kidney (B) homogenate. The results are expressed as mean  $\pm$  SD;  $n=2-3$ /group in CTL mice and  $n=6$ /group in EAE mice.
